# Supplementary material
Source: Springer Nature journal article supplement (https://www.springermedizin.de/resource/supplementary/12891_2009_796_MOESM4_ESM.pdf/9507036)
Supplement: MOESM4 [file 9507036]

## EIA Detection Tool Study

## EIA-3 Detection Tool

**To be completed by patient:**Enter **TODAY'S DATE**: \_\_\_\_/\_\_\_\_/\_\_\_\_  
Day / Month / YearEnter your **MONTH** and **YEAR** of birth: \_\_\_\_/\_\_\_\_  
Month / YearWhat is your **GENDER**? Male \_\_\_\_ Female \_\_\_\_Please circle **Yes** or **No** for each question

|    |                                                                                                                                                                                                       |     |    |
|----|-------------------------------------------------------------------------------------------------------------------------------------------------------------------------------------------------------|-----|----|
| 1  | Do you have pain in your joints?                                                                                                                                                                      | Yes | No |
| 2  | Do you have pain in your wrists and hands?                                                                                                                                                            | Yes | No |
| 3  | Are your hands or wrists swollen?                                                                                                                                                                     | Yes | No |
| 4  | Do you have trouble making a fist?                                                                                                                                                                    | Yes | No |
| 5  | Are your joints stiff in the morning?                                                                                                                                                                 | Yes | No |
| 6  | From the time you wake in the morning, does it take more than 60 minutes for your joints to move more freely?                                                                                         | Yes | No |
| 7  | Are the same joints involved on both sides of your body?                                                                                                                                              | Yes | No |
| 8  | Have important activities in your life been affected because of bone or joint problems, such as having difficulty with personal care or having to make a change regarding leisure or work activities? | Yes | No |
| 9  | Have you ever been told that you have rheumatoid arthritis?                                                                                                                                           | Yes | No |
| 10 | Does anyone in your family have rheumatoid arthritis?                                                                                                                                                 | Yes | No |
| 11 | Have you been diagnosed with a rash called psoriasis?                                                                                                                                                 | Yes | No |

**FOR OFFICE USE ONLY:**Scoring: Enter the total number of **YES** answers: \_\_\_\_\_ / 11**Primary Care Provider:** Date: \_\_\_\_\_ ICD-10 code \_\_\_\_\_ Diagnosis: \_\_\_\_\_

Name of Rheumatologist Referred to: \_\_\_\_\_

**If Patient Not Referred** to rheumatology, provide reason: \_\_\_\_\_**FAX** completed Detection Tool to the Study Centre at **416.480.6949** c/o J. Scarf
